# Supplementary material for: A single-column separation procedure for Sr, Nd, and Sm in small-size samples and high-precision isotope measurements using a TIMS with 1013 and 1012 Ω amplifiers
Source: Royal Society of Chemistry journal article supplement (doi:10.1039/d3ja00252g), 2023-10-31
Supplement: d3ja00252g1.pdf [file d3ja00252g1.pdf]

### Electronic Supplementary Information

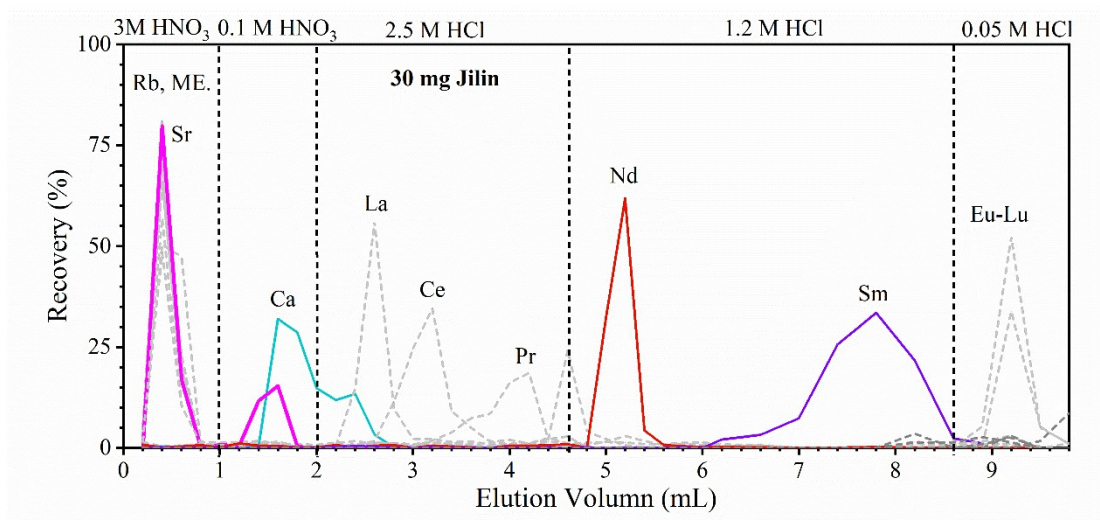

Fig. S1 Elution profiles of Sr, Nd, and Sm purification on 0.25 mL TODGA resin, tested with 30 mg Jilin. Due to sample overloading, Sr is eluted along with the major elements. "ME." refers to the matrix elements (such as Na, Mg, Al, K, Ti, Fe, Mn, and Ba).

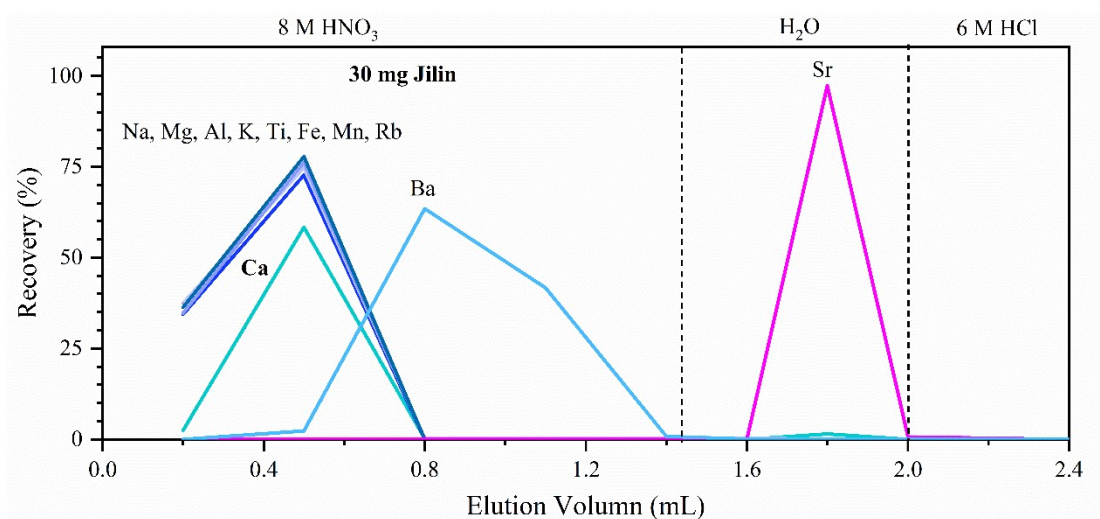

Fig. S2 The elution profile of the second column with 0.14 mL Sr-Spec resin. The Sr-containing fraction (in 3 M and 4 M HNO<sub>3</sub>) in Fig. 2 is loaded on Sr-Spec column to completely separate Sr.
